# Supplementary material
Source: publisher figshare collection journal article supplement (https://gsapubs.figshare.com/ndownloader/files/22756454)
Supplement: Supplementary file 1 [file 22756454]

TABLE DR1. RADIOCARBON AGE CONSTRAINT ON ALLUVIAL DEPOSITS AND LANDFORMS IN THE LOWER MISSISSIPPI VALLEY.  
SITE NUMBERS REFER TO SAMPLE LOCALITIES ON FIGURES 2, 3, AND 8.

| Site No.                                                 | Lab number           | Reference                   | Location                                | Saucier (1994) map unit | Channel-belt name (this study)     | Depositional context                               | Material sampled            | <sup>14</sup> C age yr. B.P. | cal. ka <sup>†</sup> | Interpretation (this paper)                 |
|----------------------------------------------------------|----------------------|-----------------------------|-----------------------------------------|-------------------------|------------------------------------|----------------------------------------------------|-----------------------------|------------------------------|----------------------|---------------------------------------------|
| Braid belts in the Eastern and Western Lowlands (Fig. 3) |                      |                             |                                         |                         |                                    |                                                    |                             |                              |                      |                                             |
| HL                                                       | Beta-22658           | Delcourt et al., 1997       | Hood Lake Poinsett Co. Arkansas         | Pve 2                   | Melville Ridge                     | Base of lacustrine deposition                      | Bulk lake sediment          | 10,080 ± 230                 | <b>11.8 ± 0.9</b>    | Minimum age for Melville Ridge braid belt   |
| PFS                                                      | Beta-15321           | Royall et al., 1991         | Powers Fort Swale, Butler Co., Missouri | Pve 2                   | Ash Hill                           | Lower braid channel-fill sand                      | Bulk sediment               | 17,370 ± 170                 | <b>20.6 ± 0.5</b>    | Minimum age for the Ash Hill braid belt     |
| MT                                                       | Beta-77068           | Blum et al., 2000           | Mariana core transect, Arkansas         | Pve 3                   | minor flow through Marianna Gap    | Stratified silt                                    | Wood                        | 20,240 ± 310                 | <b>24.4 ± 0.9</b>    | Age of last flow through Marianna Gap       |
| SE                                                       | Beta-106258          | Blum et al., 2000           | near Jonesboro, Arkansas                | Pve 4                   | Sikeston (Jonesboro seg.)          | Channel-belt sand under loess                      | Plant material              | 16,570 ± 60                  | <b>19.7 ± 0.2</b>    | Age of the Sikeston braid belt              |
| LC                                                       | I-10,197             | Grissinger et al., 1982     | Lick Creek, Phillips Co. Arkansas       | Pvl 2                   | Sikeston (Oneida segment)          | Alluvial fill of Lick Creek                        | <i>Fagus</i> sp. wood       | 9,510 ± 140                  | <b>10.8 ± 0.4</b>    | Minimum age for Oneida(Sikeston) braid belt |
| MD                                                       | Beta-41984           | Wesnousky and Leffler, 1992 | Ditch near Manila, Arkansas             | Pvl 2                   | Kennett                            | Lower braid channel-fill muds                      | Bark-covered wood           | 11,100 ± 100                 | <b>13.0 ± 0.2</b>    | Minimum age for the Kennett braid belt      |
| PL                                                       | NZA-1000             | Wesnousky and Leffler, 1992 | Ditch south of Kennett, Missouri        | Pvl 2                   | Kennett                            | Upper braid channel-belt sands                     | Amino acids from paleollama | 10,890 ± 130                 | <b>12.9 ± 0.2</b>    | Minimum age for the Kennett braid belt      |
| CF                                                       | Beta-39454           | Porter and Guccione, 1994   | near Charleston, Missouri               | Pvl 1                   | Charleston                         | Base of back-swamp mud over fan                    | Whole soil                  | 10,590 ± 200                 | <b>12.4 ± 0.5</b>    | Minimum age for the Charleston braid belt   |
| BL                                                       | Beta-17028           | Guccione et al., 1988       | Big Lake near Manila, Arkansas          | Pvl 1                   | Morehouse                          | Base of back-swamp mud over fluvial sand           | Bulk sediment               | 9050 ± 150                   | <b>10.1 ± 0.4</b>    | Minimum age for the Morehouse braid belt    |
| OF                                                       | ISGS-326             | King and Allen, 1977        | Old Field site Advance, Missouri        | Pvl 1                   | Morehouse                          | Base of peat over fluvial sand                     | Peat                        | 8810 ± 90                    | <b>9.9 ± 0.3</b>     | Minimum age for the Morehouse braid belt    |
| TG                                                       | AA-4805              | Gramley and Funk, 1991      | 6m above river, Thebes Gap, Illinois    | Thebes Gap              | Thebes Gap                         | Pre-Dalton horizon in archeologic site             | charcoal                    | 9975 ± 125                   | <b>11.6 ± 0.4</b>    | Minimum age for the erosion of Thebes Gap   |
| TG                                                       | Beta-32366, ETH-5671 | Gramley and Funk, 1991      | 6m above river, Thebes Gap, Illinois    | Thebes Gap              | Thebes Gap                         | Dalton horizon in archeologic site                 | charcoal (AMS)              | 9115 ± 100                   | <b>10.3 ± 0.3</b>    | Minimum age for the erosion of Thebes Gap   |
| Cache Valley of the Ohio River (Fig. 3)                  |                      |                             |                                         |                         |                                    |                                                    |                             |                              |                      |                                             |
| -                                                        | ISGS 1269            | Esling et al., 1989         | Cache Valley                            | Ptb                     | Brownfield terrace in Cache valley | Organics near top of outwash                       | organic material            | 25,343 ± 450                 | <b>NA</b>            | Maximum age of Brownfield terrace           |
| -                                                        | ISGS 1265            | Graham, 1985                | Cache Valley                            | Hal                     | Holocene Alluvium                  | Holocene alluvium from Cache River                 | disseminated organics       | 8160 ± 180                   | <b>9.1 ± 0.5</b>     | Minimum age for abandonment of Cache Valley |
| Braid belts on Macon Ridge (Fig. 8)                      |                      |                             |                                         |                         |                                    |                                                    |                             |                              |                      |                                             |
| FP1                                                      | G-110                | Saucier, 1968               | Franklin Parish, Louisiana              | Pve 3                   | Lower Macon Ridge                  | Shell-rich sediment over fluvial sand, under loess | Fresh-water snails          | 31,200 ± 2400                | <b>NA</b>            | Minimum age of Lower Macon Ridge braid belt |
| FP2                                                      | GXO-844              | Saucier, 1968               | Franklin Parish, Louisiana              | Pve 3                   | Lower Macon Ridge                  | Shell-rich sediment over fluvial sand, under loess | Fresh-water snails          | 29,100 ± 1200                | <b>NA</b>            | Minimum age of Lower Macon Ridge braid belt |

| Evidence for initiation of meandering (Fig. 3)                            |                |                       |                                          |                    |                                              |                                            |                           |              |                   |                                                         |
|---------------------------------------------------------------------------|----------------|-----------------------|------------------------------------------|--------------------|----------------------------------------------|--------------------------------------------|---------------------------|--------------|-------------------|---------------------------------------------------------|
| BL                                                                        | Beta-17028     | Guccione et al., 1988 | Big Lake near Manila, Arkansas           | Pvl 1              | Morehouse                                    | Base of backswamp mud over fluvial sand    | Bulk sediment             | 9050 ± 150   | <b>10.1 ± 0.4</b> | Minimum age for the initiation of meandering            |
| PB                                                                        | Beta-17030     | Guccione, 1987        | Pemscott Bayou, Arkansas                 | Hps                | Small meander belt that cross-cuts Morehouse | natural levee and crevasse splay           | Bulk sediment             | 8530 ± 300   | <b>9.5 ± 0.8</b>  | Minimum age for the initiation of meandering            |
| PM                                                                        | ISGS NO A-0093 | Holbrook et al., 2006 | Portageville meander, Missouri           | Hpm 1              | Portageville meander                         | channel-fill mud in abandoned channel loop | single seed               | 5414 ± 60    | <b>6.2 ± 0.2</b>  | Minimum age for the initiation of meandering            |
| Buried channel belts near Natchez, Mississippi (Fig. 8)                   |                |                       |                                          |                    |                                              |                                            |                           |              |                   |                                                         |
| F1                                                                        | CAMS 7194      | Aslan and Autin, 1999 | near Ferriday Mississippi                | Hb over substratum | backswamp mud over channel belt              | base of mud over channel-belt sand         | Bulk sediment             | 16,600 ± 140 | <b>19.7 ± 0.3</b> | Maximum age for buried channel belt                     |
| Buried channel belts in the Achafalaya Basin west of Baton Rouge (Fig. 2) |                |                       |                                          |                    |                                              |                                            |                           |              |                   |                                                         |
| A1                                                                        | O-277          | McFarlan, 1961        | east of Opelousas, Louisiana             | Hb over substratum | backswamp mud over Kennett/Sikeston          | base of mud over channel-belt sand         | wood fragment (-18 m asl) | 9600 ± 200   | <b>10.9 ± 0.7</b> | Minimum age for upper buried surface (Kennett/Sikeston) |
| A2                                                                        | O-264          | McFarlan, 1961        | I-10 east of Achafalaya River, Louisiana | Hb over substratum | backswamp mud over Morehouse                 | base of mud over channel-belt sand         | wood fragment (-32 m asl) | 9950 ± 200   | <b>11.5 ± 0.7</b> | Minimum age for lower buried surface (Morehouse)        |
| A3                                                                        | O-276          | McFarlan, 1961        | I-10 east of Achafalaya River, Louisiana | Hb over substratum | backswamp mud over Morehouse                 | base of mud over channel-belt sand         | wood fragment (-29 m asl) | 9700 ± 200   | <b>11.1 ± 0.7</b> | Minimum age for lower buried surface (Morehouse)        |
| A4                                                                        | O-278          | McFarlan, 1961        | I-10 east of Achafalaya River, Louisiana | Hb over substratum | backswamp mud over Morehouse                 | base of mud over channel-belt sand         | wood fragment (-30 m asl) | 9650 ± 200   | <b>11.1 ± 0.6</b> | Minimum age for lower buried surface (Morehouse)        |

<sup>†</sup> Radiocarbon ages converted to calendar years by CALIB 5.0 (Stuiver and Reimer, 1993) using IntCal04 (Reimer et al., 2004) and reported as the midpoint of the two sigma range. Samples older than 21.4 <sup>14</sup>C ka BP shown in radiocarbon years.

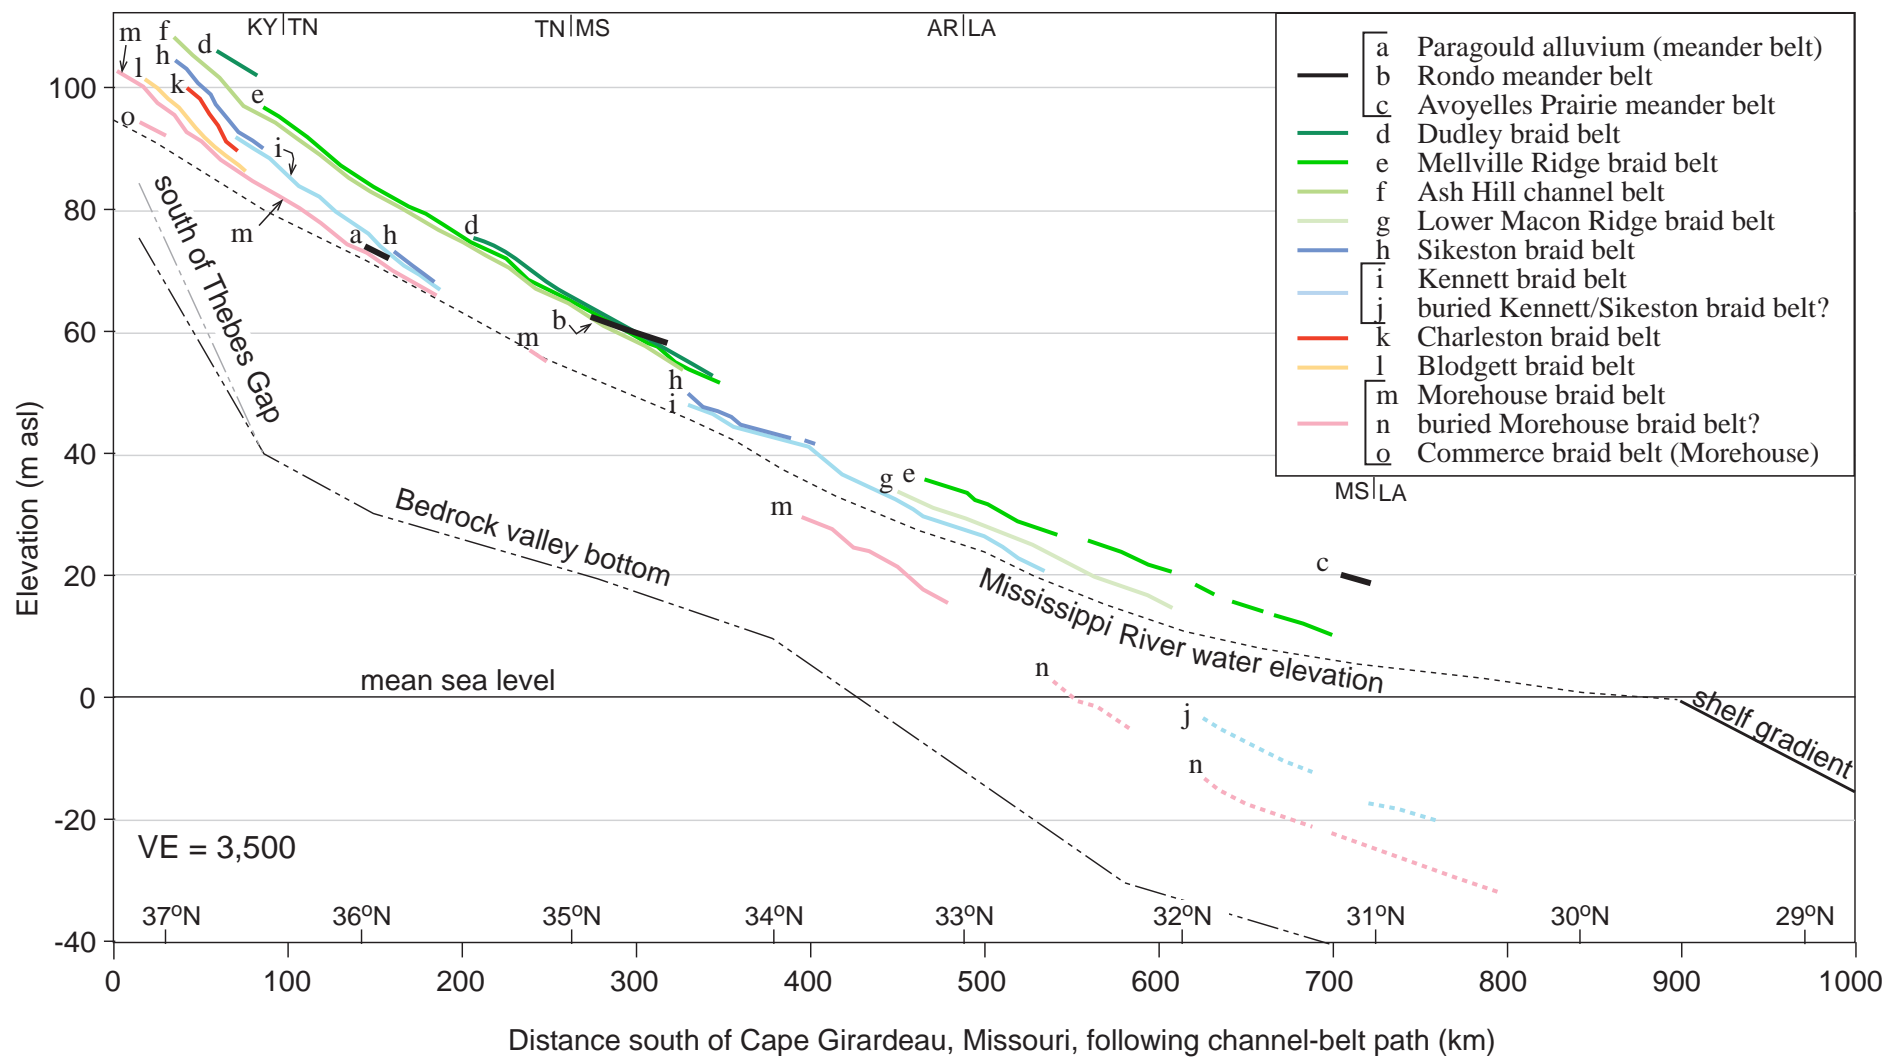

Rittenour Fig. DR1

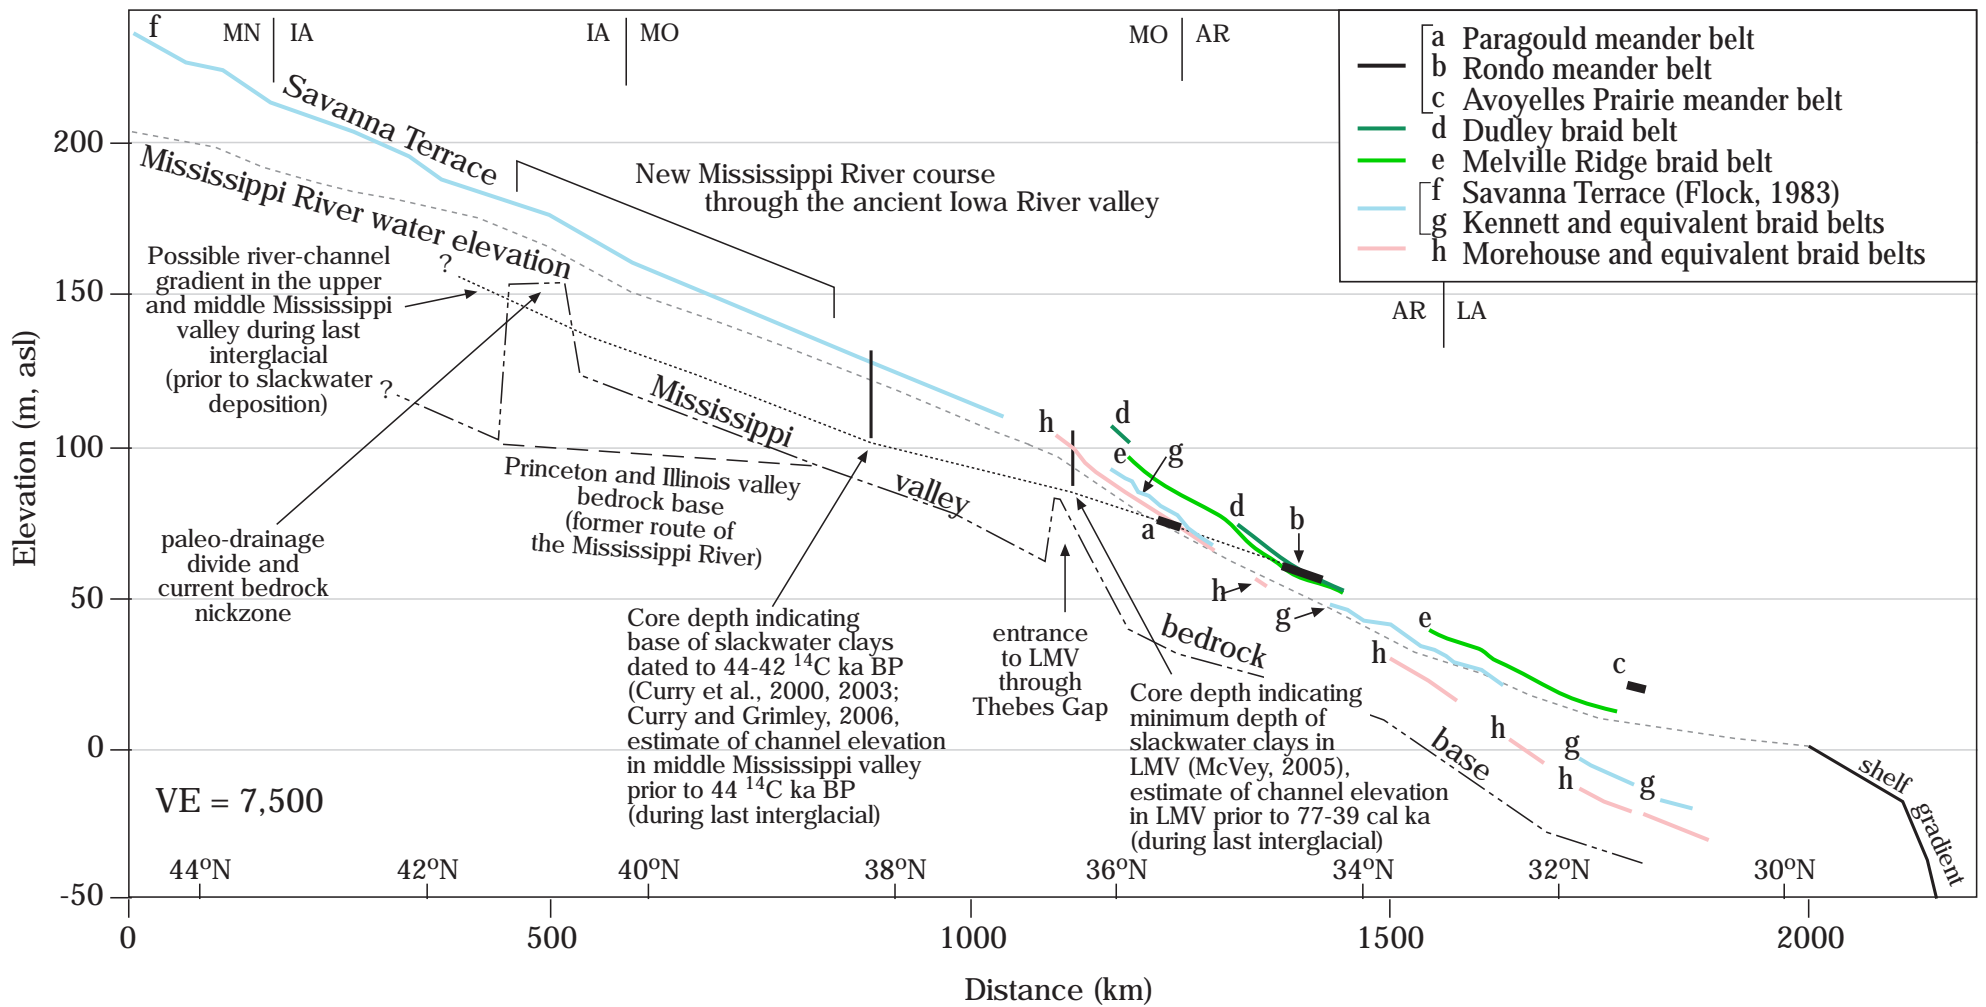

Rittenour, Fig. DR2
